# Supplementary material for: In vitro and in silico evaluation of EGFR targeting activities of curcumin and its derivatives
Source: Royal Society of Chemistry journal article supplement (doi:10.1039/d1fo02002a), 2021-01-01
Supplement: d1fo02002a1.pdf [file d1fo02002a1.pdf]

## Supplementary Material

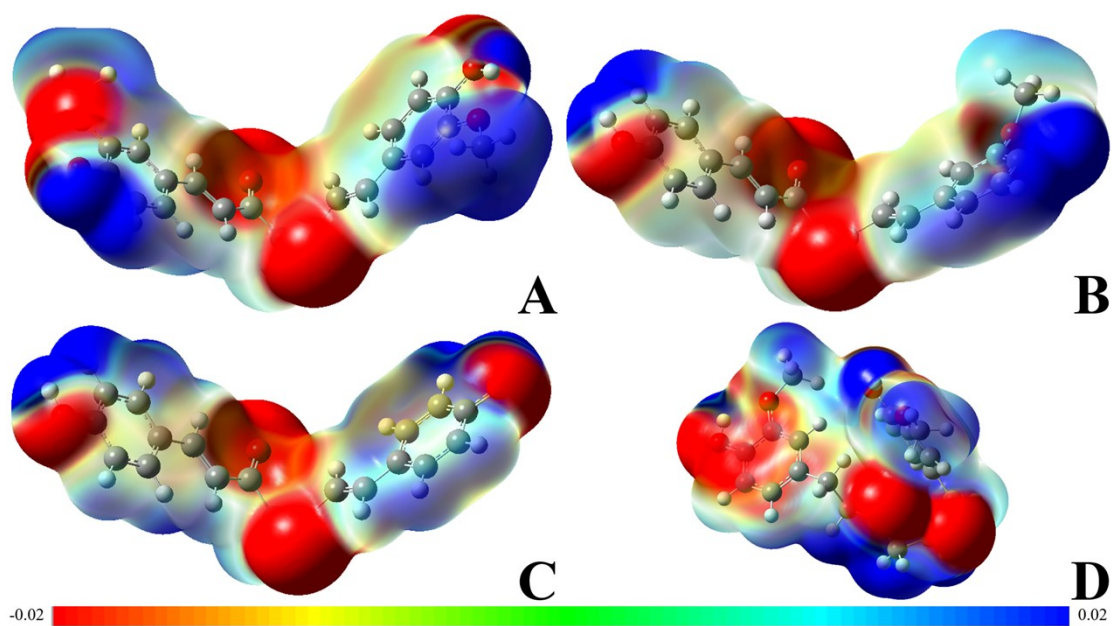

**Fig. S1.** Molecular electrostatic potential surfaces (MEPS) of curcumin (A), demethoxycurcumin (B), bisdemethoxycurcumin (C), and tetrahydrocurcumin (D). The electronegative and electropositive MEPS are shown in red and blue respectively.

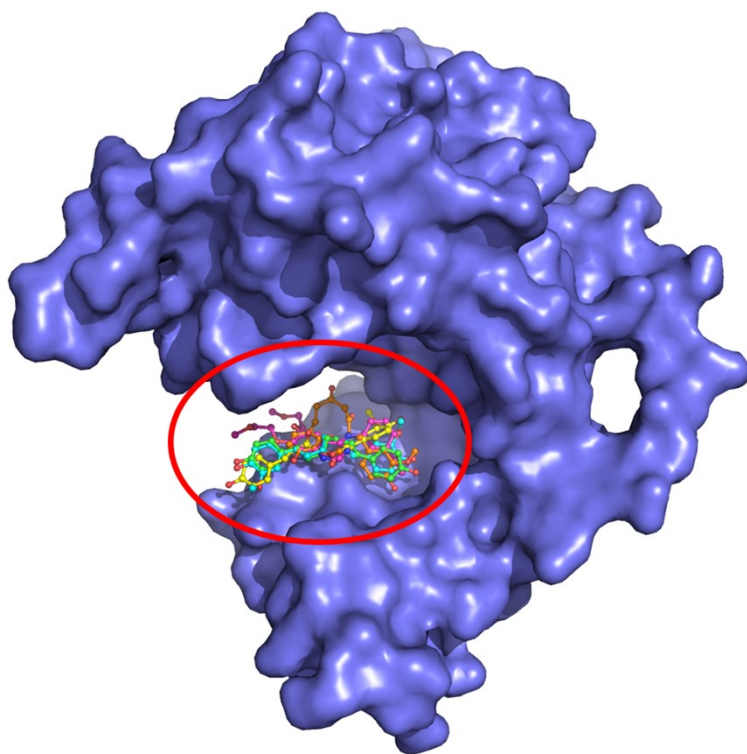

**Fig. S2.** The docked ligands curcumin (cyan), demethoxycurcumin (yellow), bisdemethoxycurcumin (green), and tetrahydrocurcumin (orange) as well as the co-crystal ligand erlotinib (magenta) in the hydrophobic cavity of EGFR.

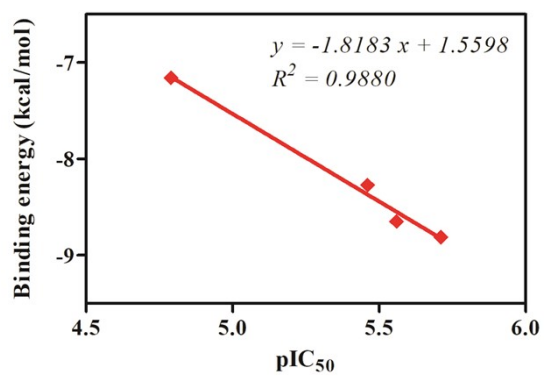

Fig. S3. Correlation of the calculated binding energies with the experimental pIC<sub>50</sub> values.
